# Supplementary material for: Discovery of new chromen-4-one derivatives as telomerase inhibitors through regulating expression of dyskerin
Source: PubMed Central journal article supplement (PMC6104605; doi:10.1080/14756366.2018.1466881), 2018-08-22

## Supporting information

### NMR of compound 5a~5l

5a:

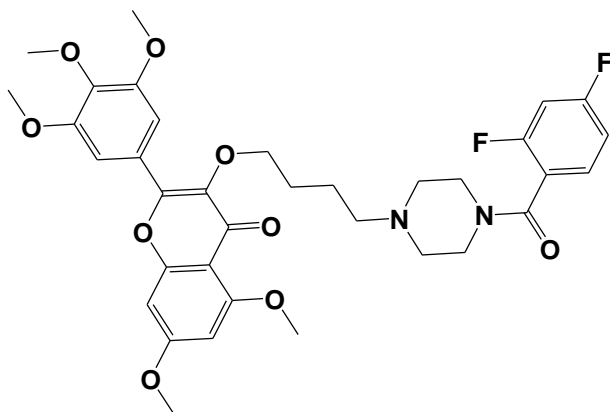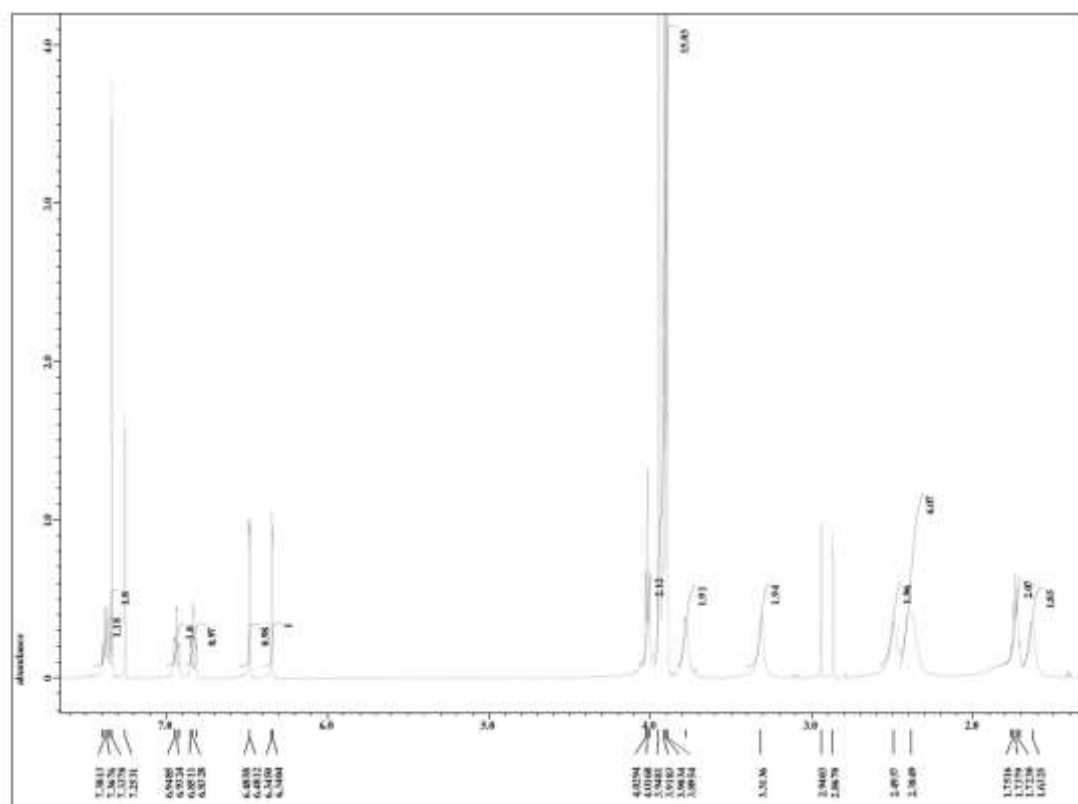

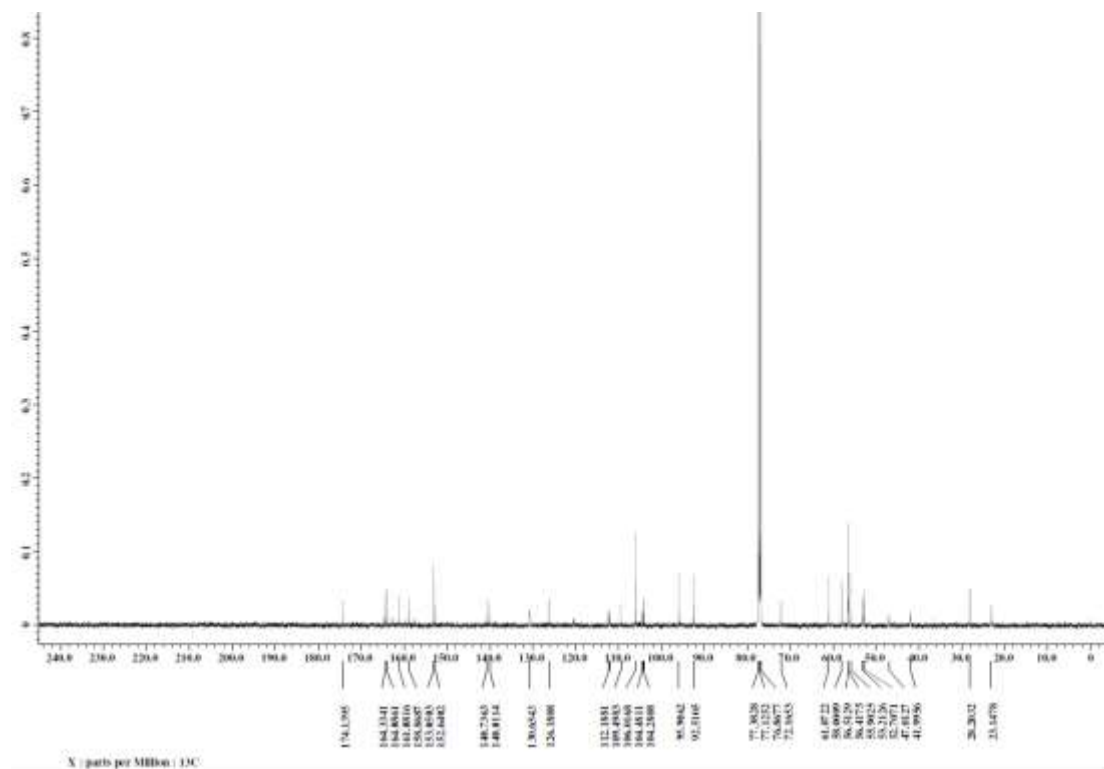

5b:

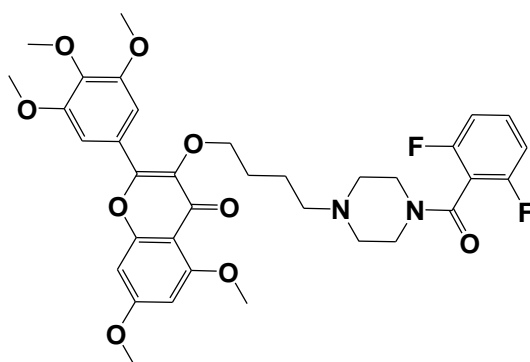

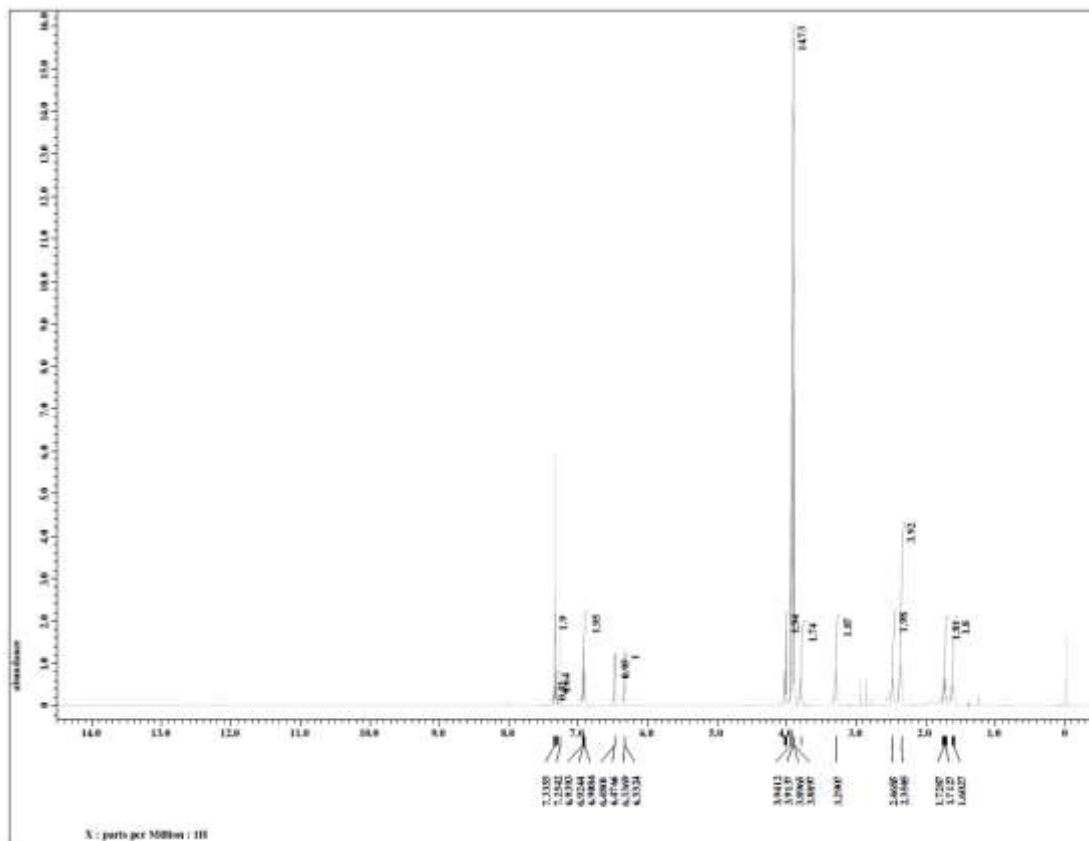

5c:

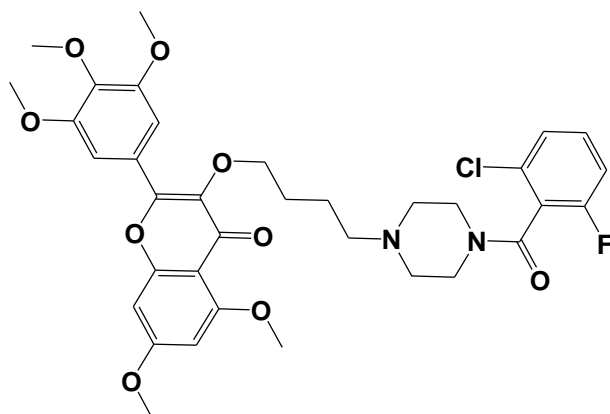

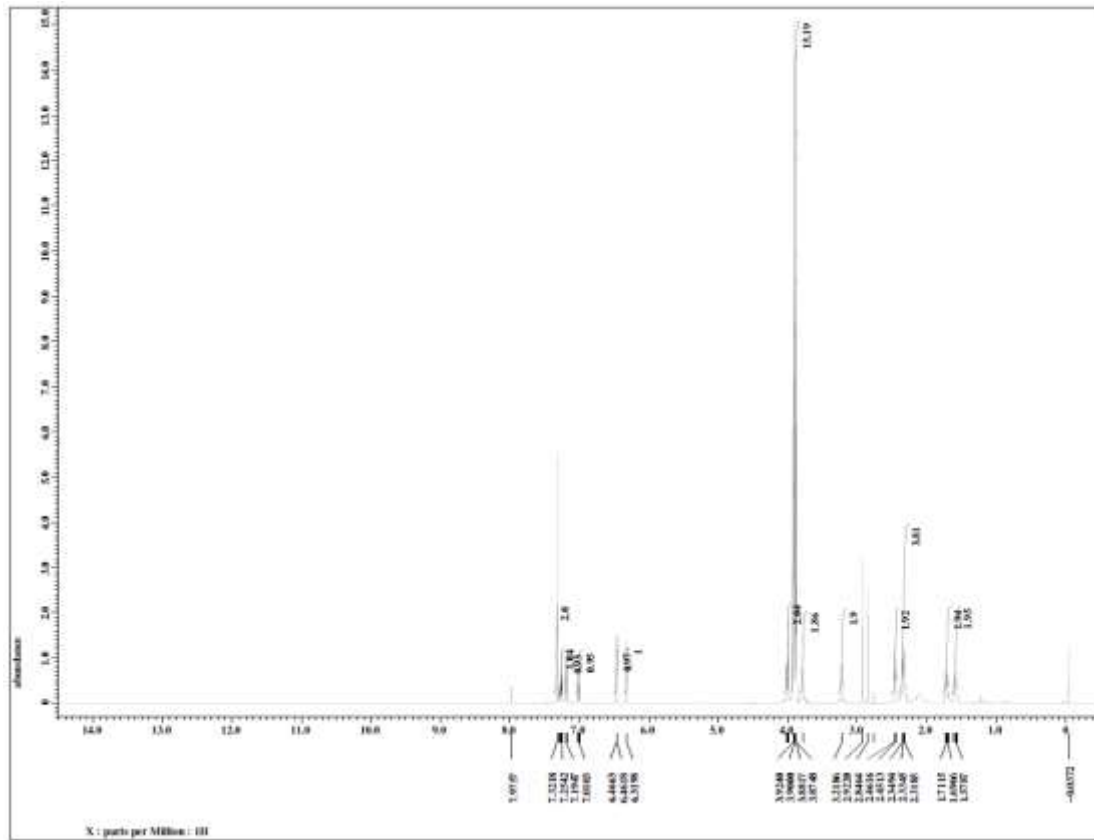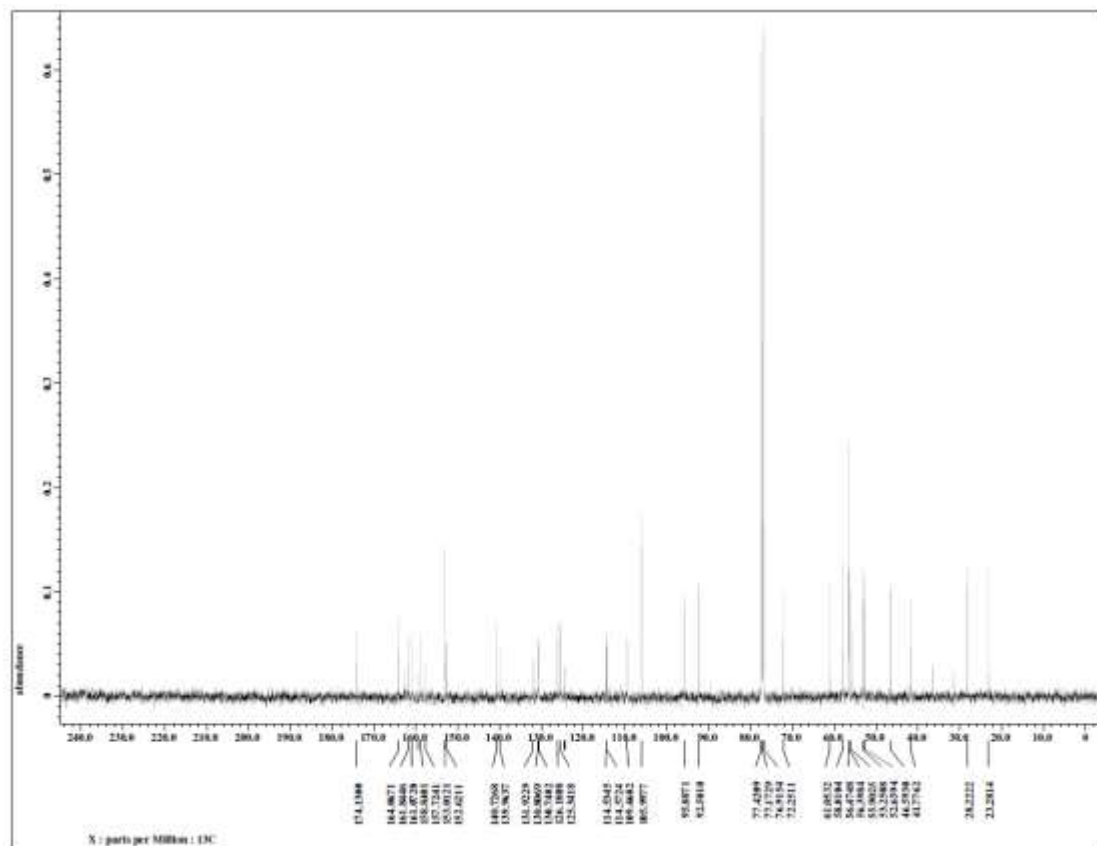

5d:

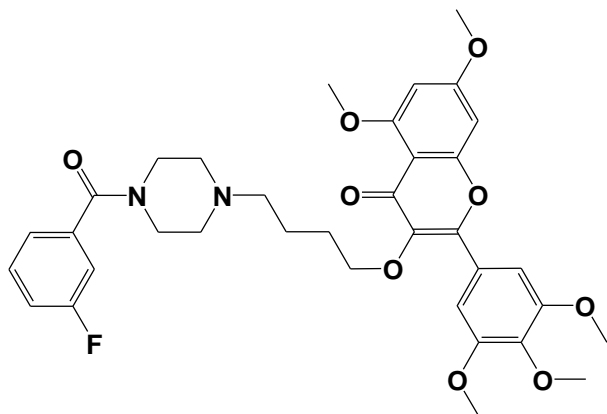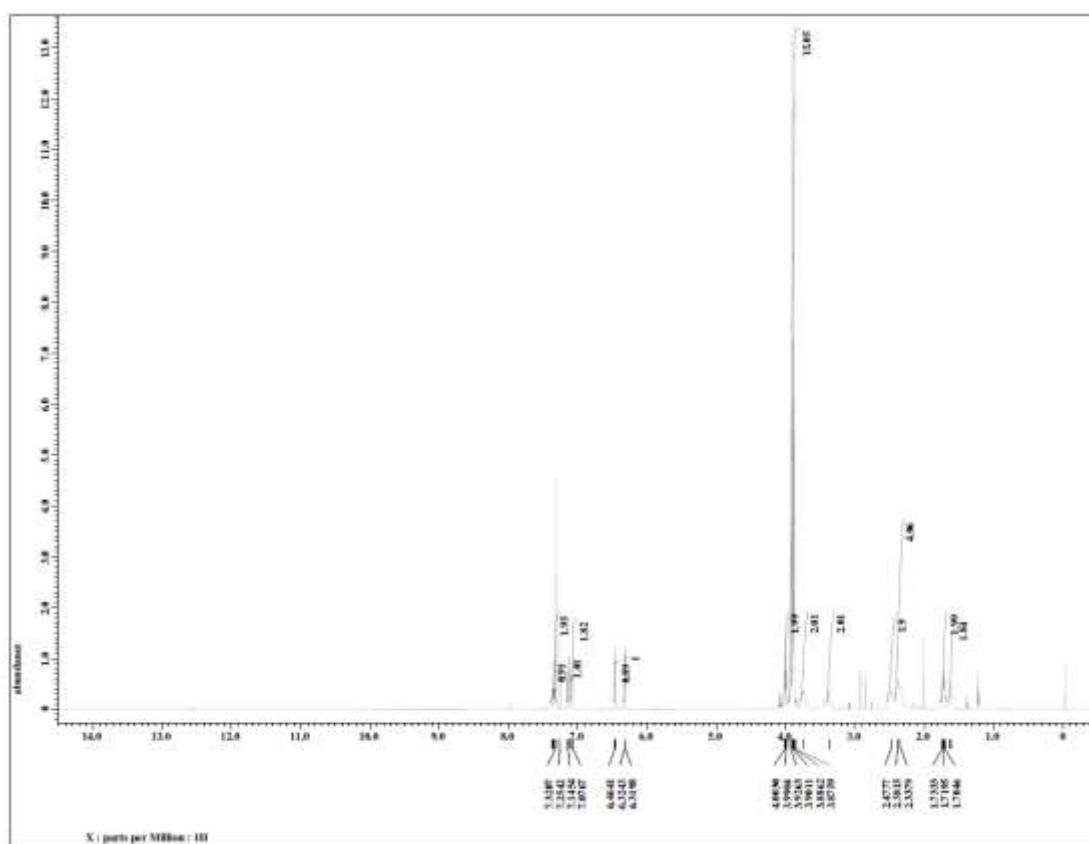

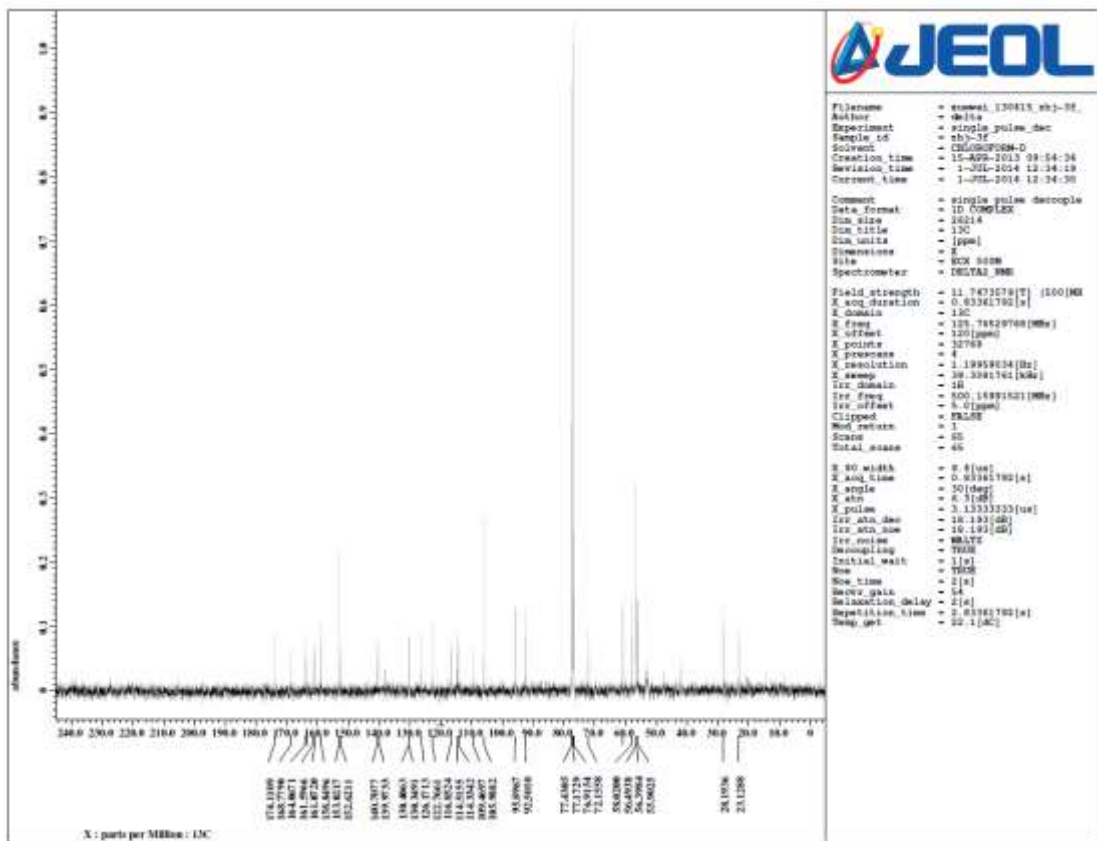

5e:

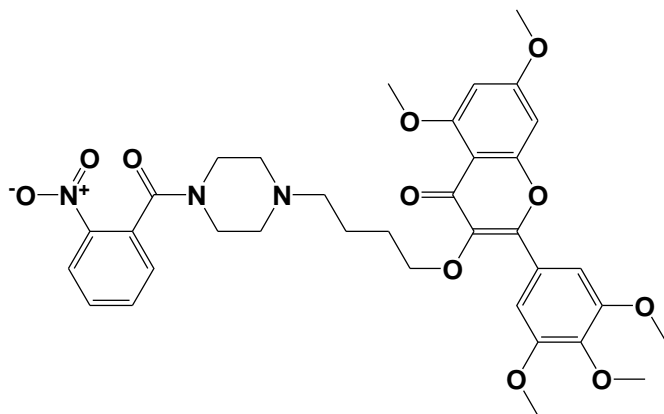

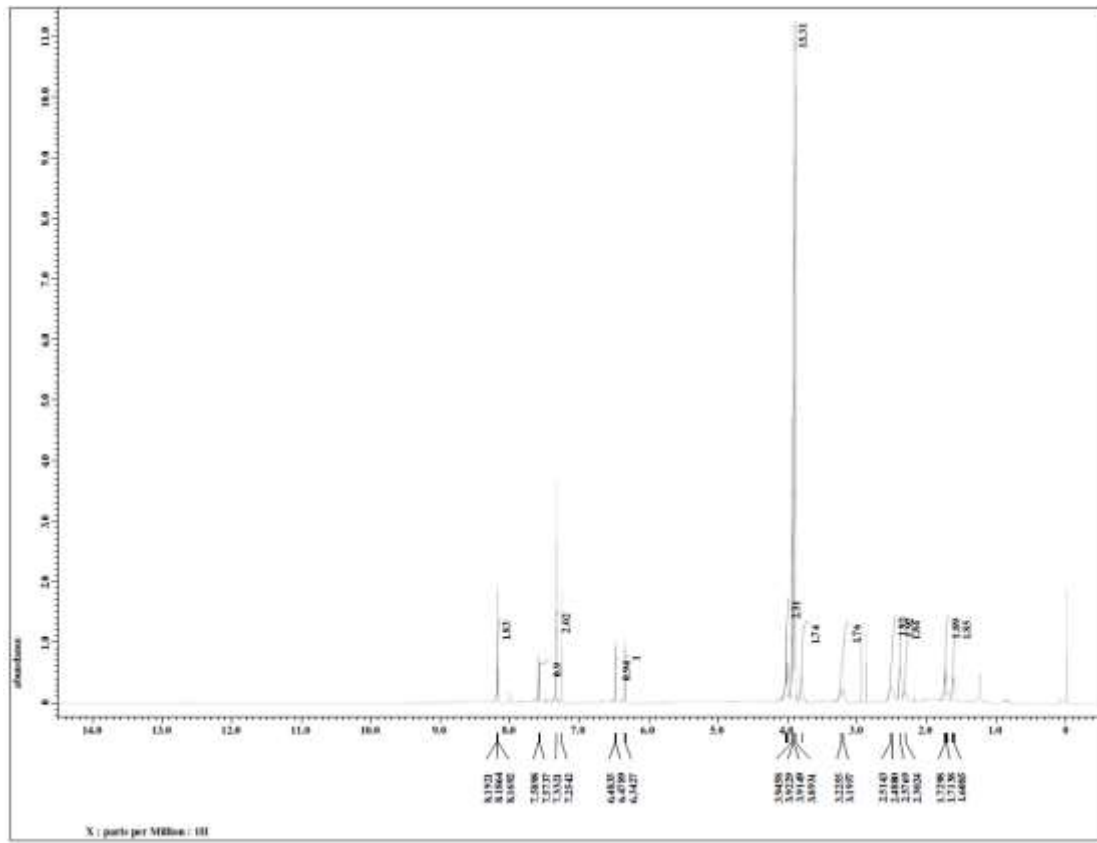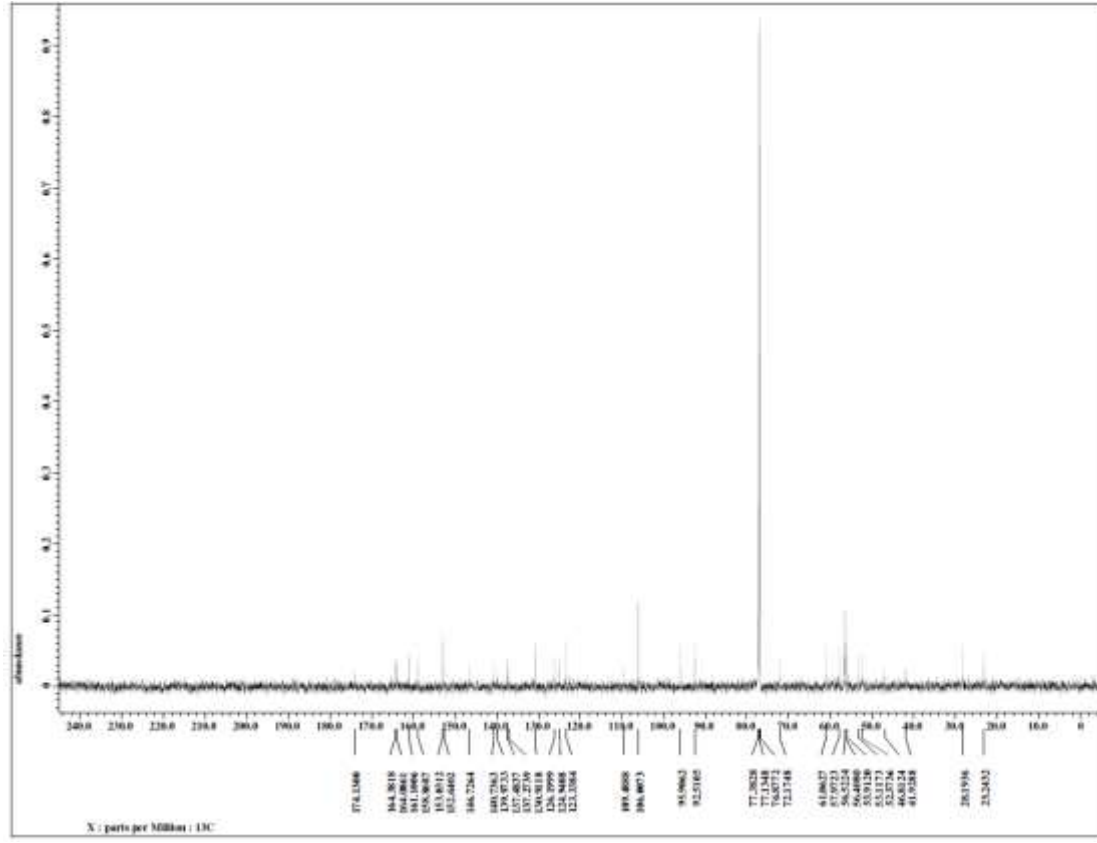

5f:

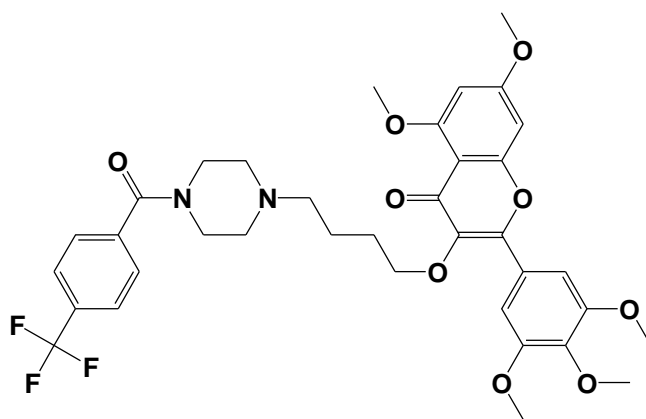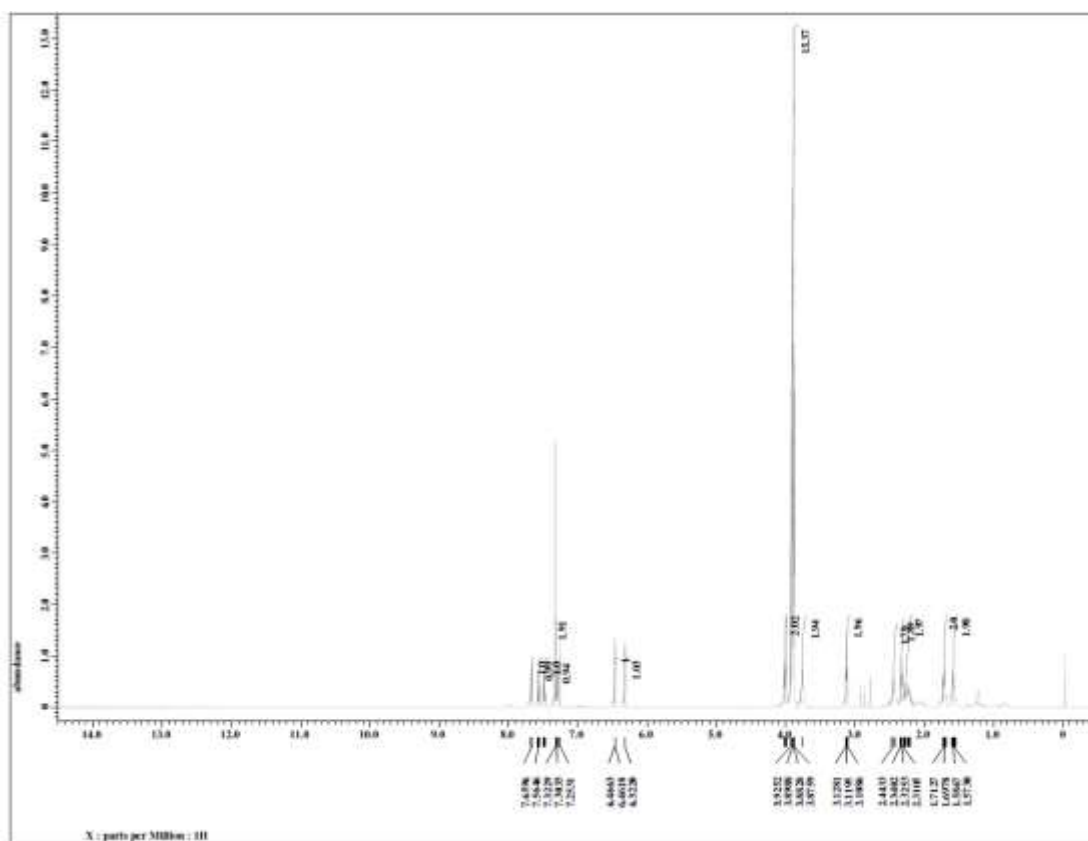



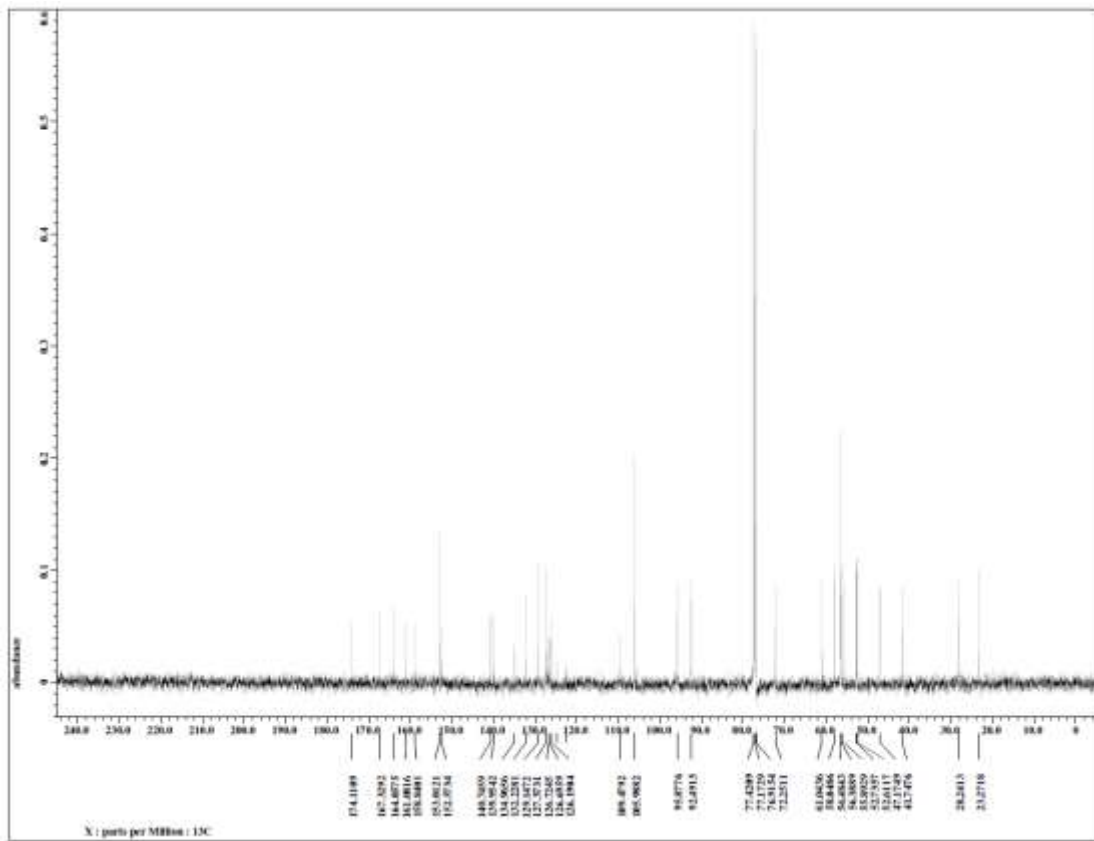

5g:

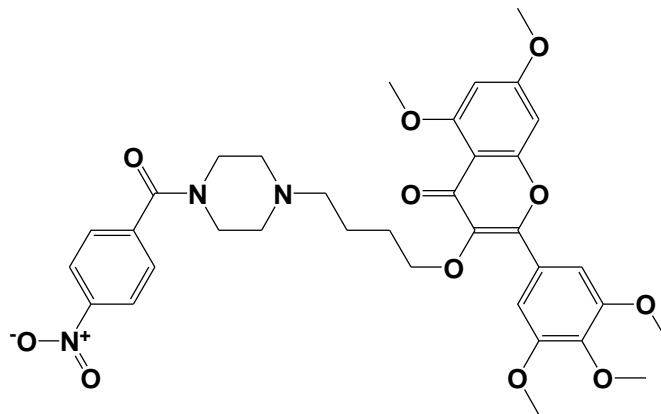



5h:

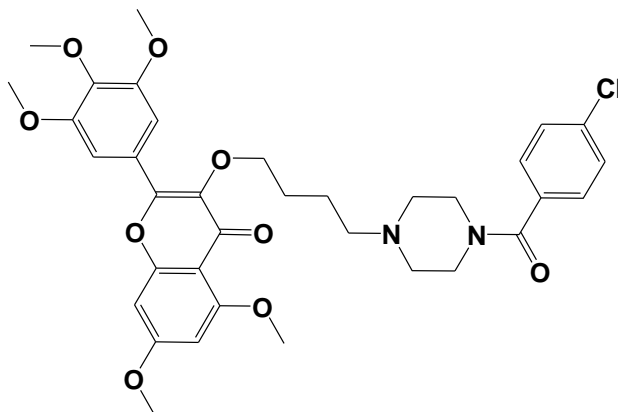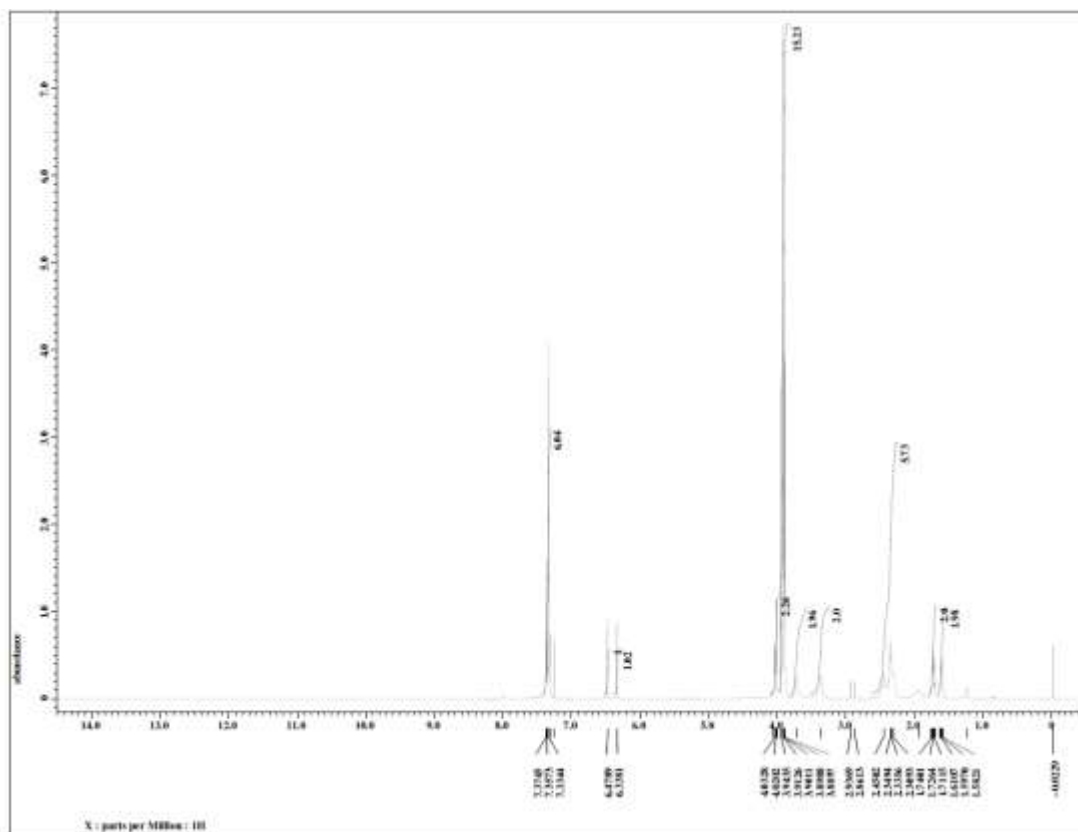

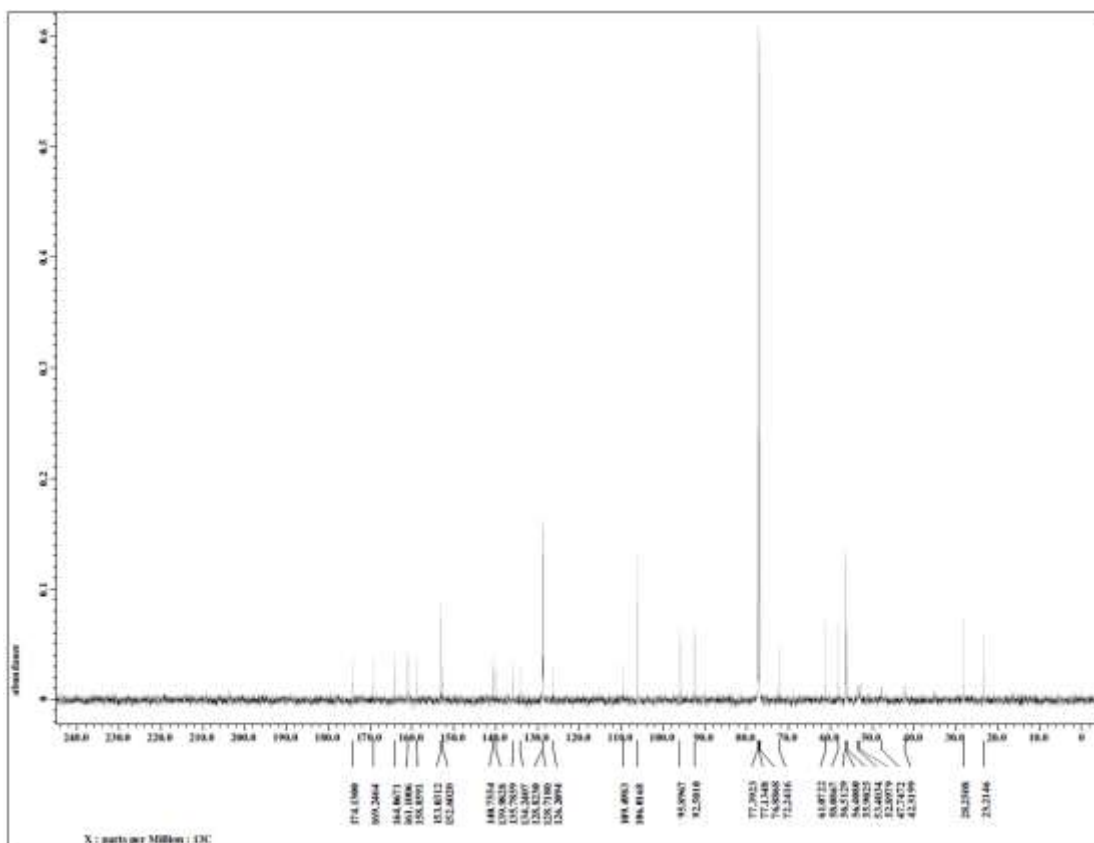

5i:

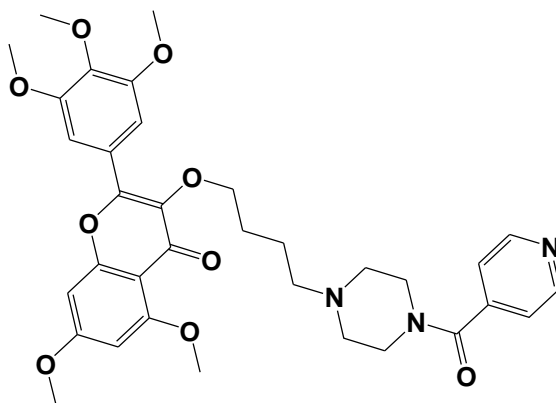



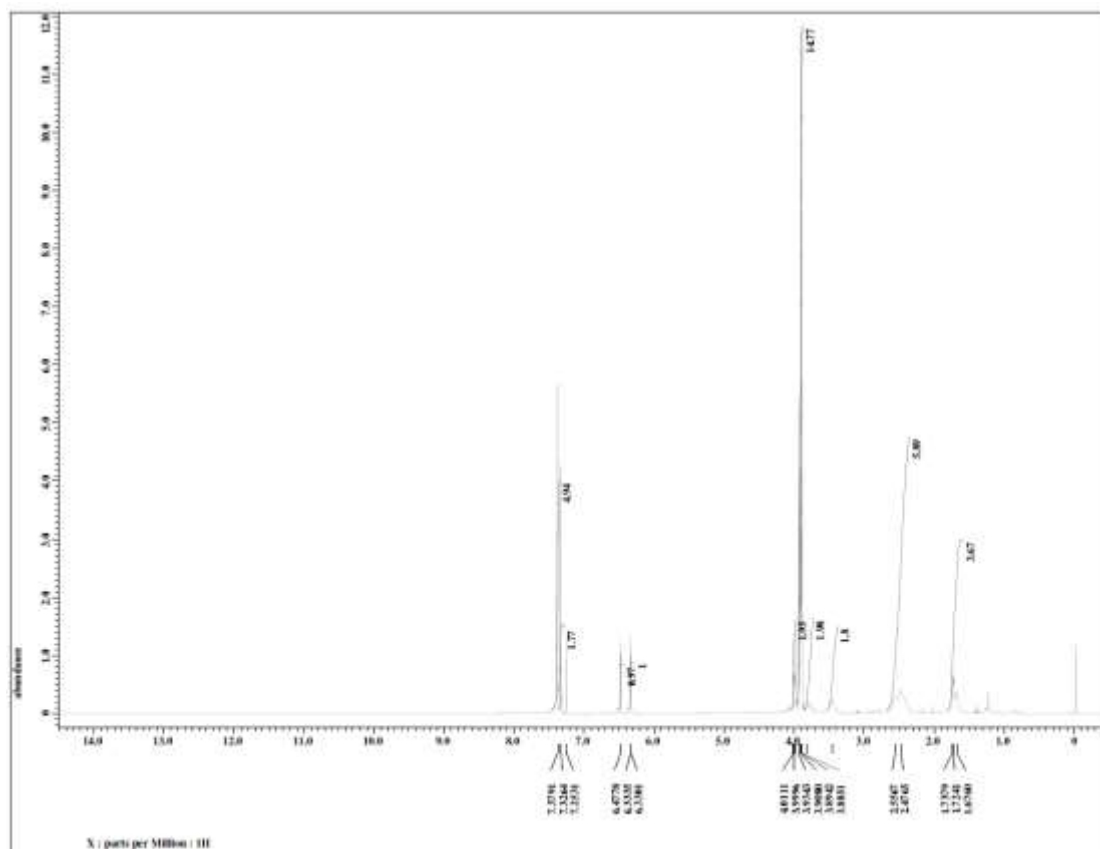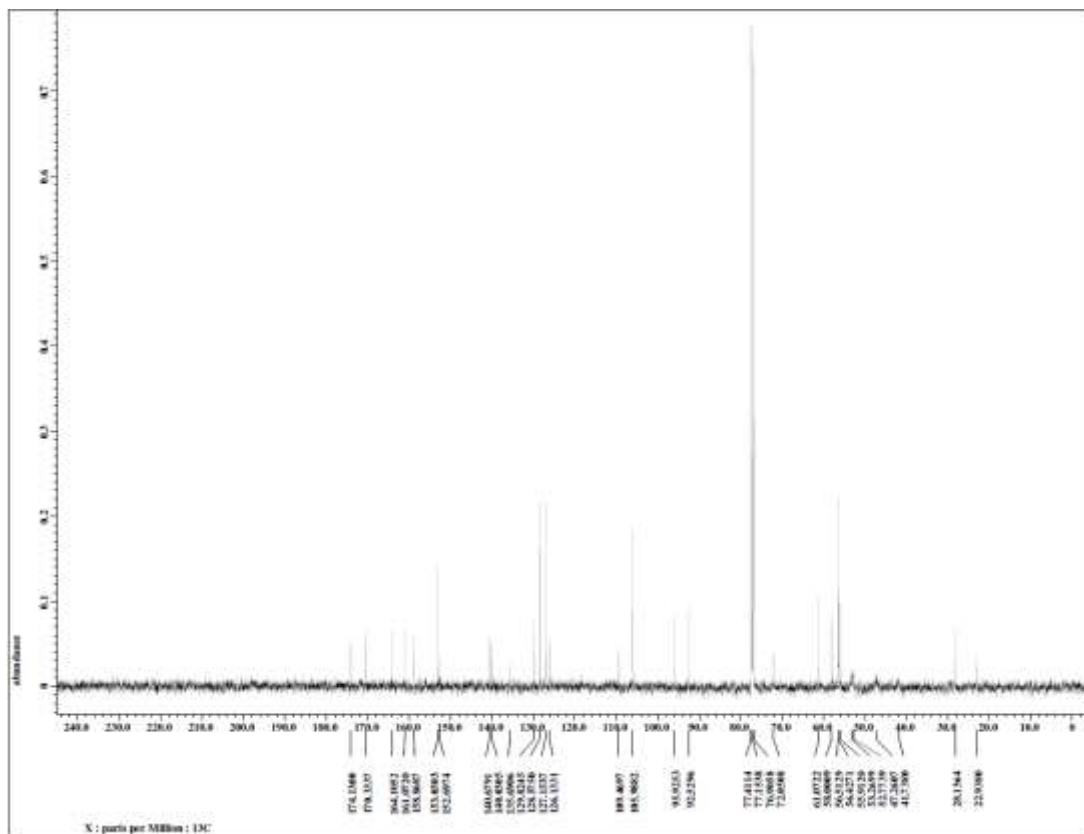



5l:

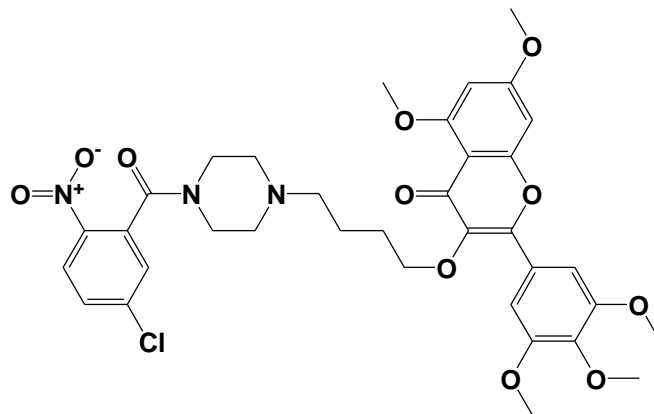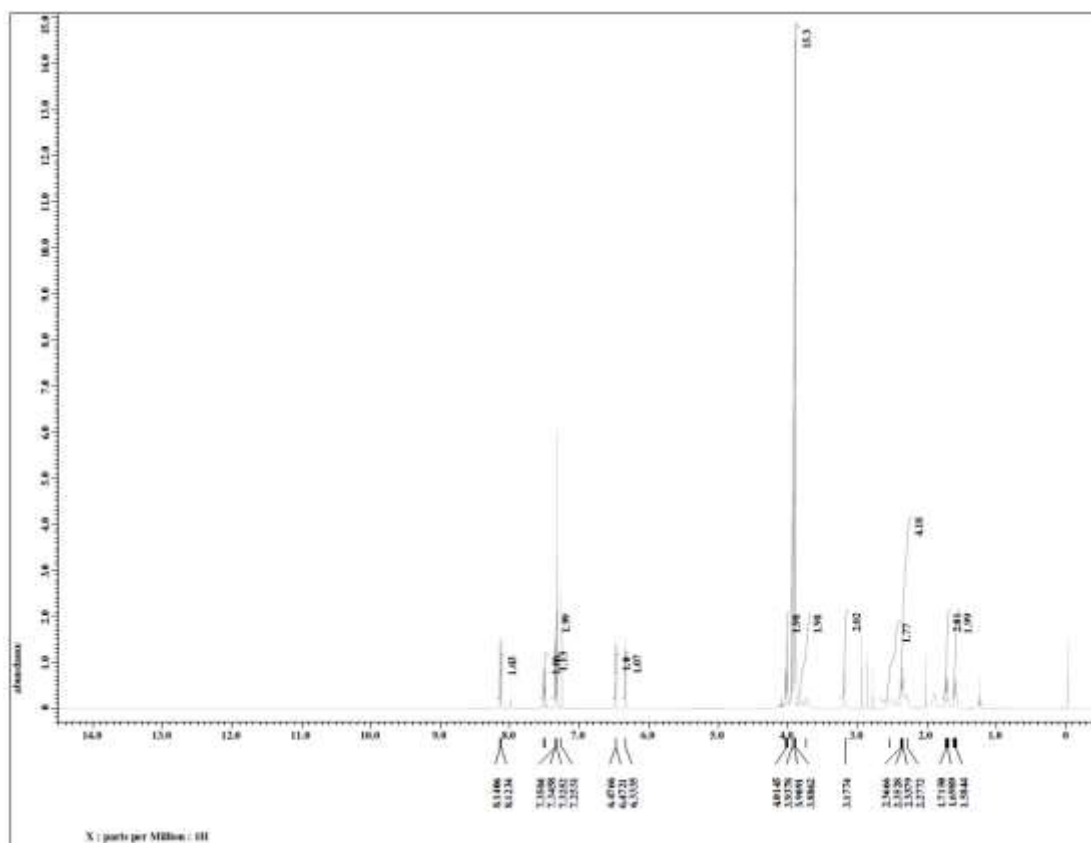



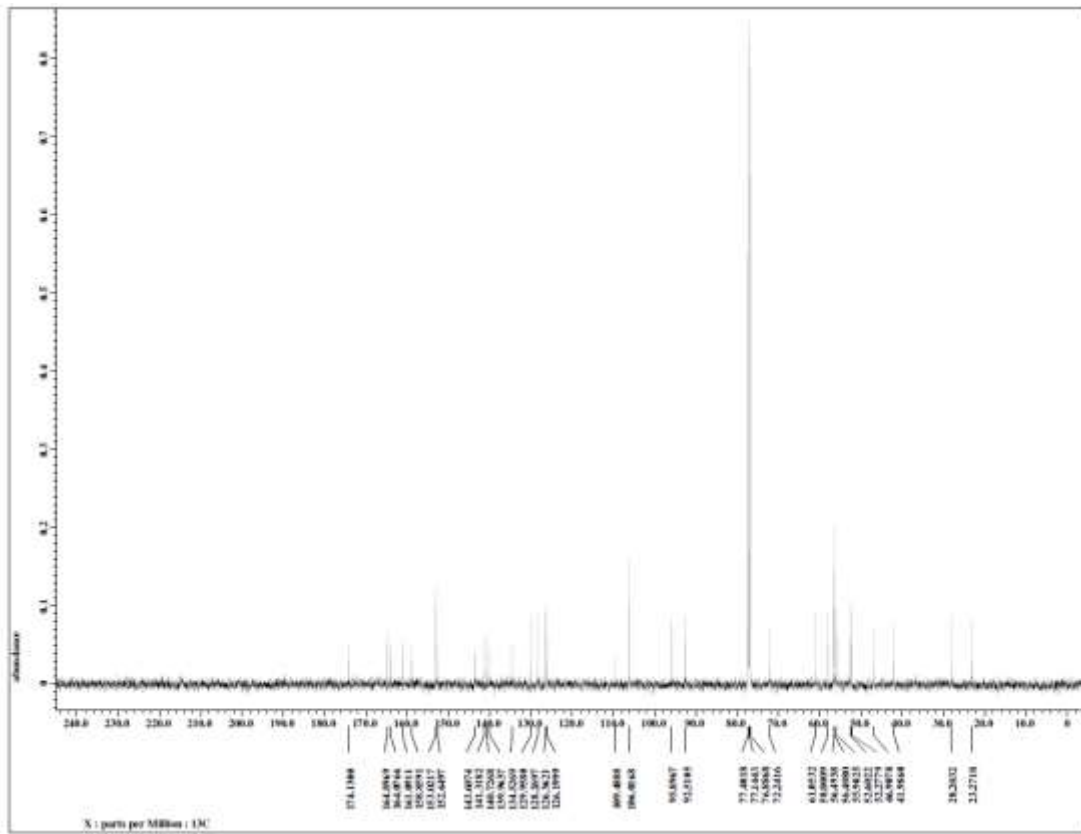

Supplement: IENZ_A_1466881_SM4808.pdf [file IENZ_A_1466881_SM4808.pdf]
